# Supplementary material
Source: MDPI journal article supplement (https://www.mdpi.com/1999-4907/14/10/2109)
Supplement: s1 [file s1]

## **Supporting Information**

### **Intelligent Analysis Strategy for the Key Factor on Soil Nitrogen and Phosphorus Loss via Runoff under Simulated Karst Conditions**

**Yuqi Zhang, Rongchang Zeng, Tianyang Li, Lan Song, Binghui He\***

College of Resources and Environment, Southwest University,

Chongqing 400715, China

\* Corresponding author

E-mail: hebinghui@swu.edu.cn (B.H.)

# Table of Contents

|                            |            |
|----------------------------|------------|
| <b>Figure S1</b>           | <b>S3</b>  |
| <b>Figure S2</b>           | <b>S4</b>  |
| <b>Figure S3</b>           | <b>S5</b>  |
| <b>Figure S4</b>           | <b>S6</b>  |
| <b>Figure S5</b>           | <b>S7</b>  |
| <b>Figure S6</b>           | <b>S8</b>  |
| <b>Figure S7</b>           | <b>S9</b>  |
| <b>Figure S8</b>           | <b>S10</b> |
| <b>Figure S9</b>           | <b>S11</b> |
| <b>Figure S10</b>          | <b>S12</b> |
| <b>Figure S11</b>          | <b>S13</b> |
| <b>Frame diagram of RF</b> | <b>S14</b> |
| <b>RF code</b>             | <b>S14</b> |

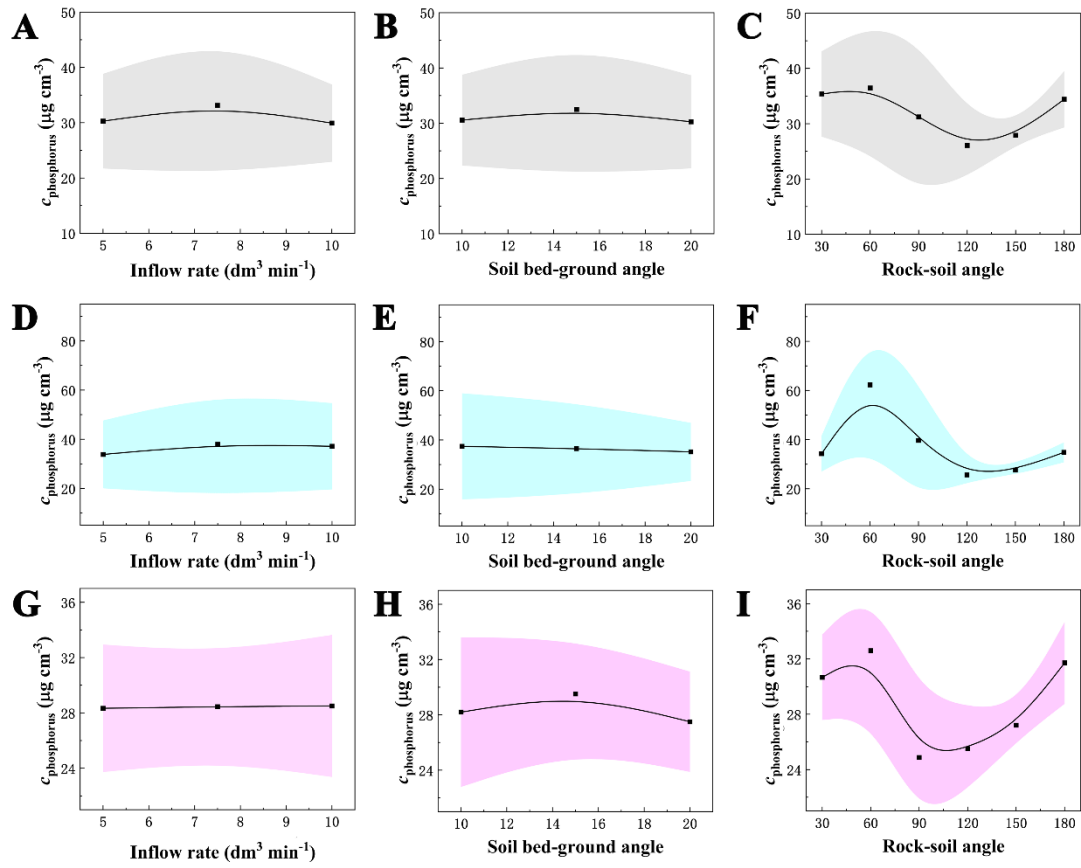

**Figure S1.** Characteristics relationships between the concentration of SP and inflow rate ( $v$ ), soil bed-ground angle ( $\alpha$ ), and rock-soil angle ( $\beta$ ) in soil surface runoff (A – C), subsurface runoff (D – F), and fissures runoff (G – I), respectively. The dot means the average nitrogen concentration and the graph means the standard deviation.

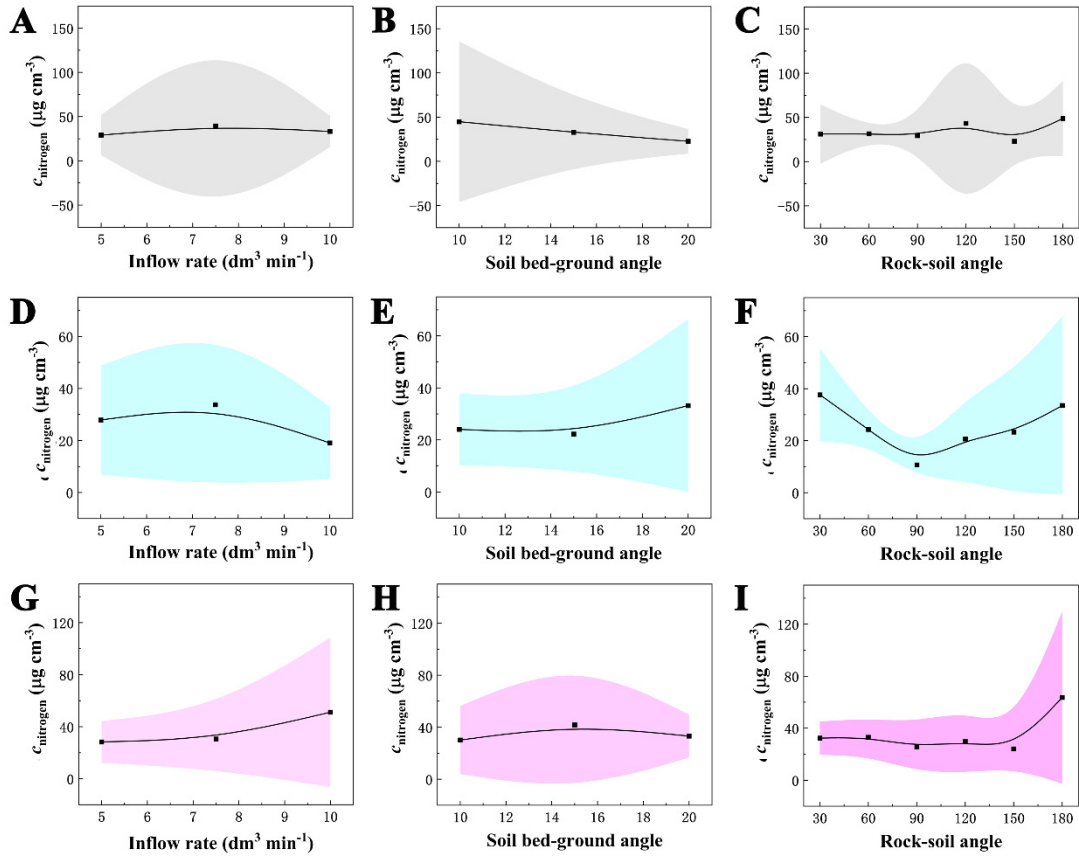

**Figure S2.** Characteristics relationships between the  $\text{NH}_4\text{-N}$  concentration and  $v$ ,  $\alpha$ , and  $\beta$  in soil surface runoff (A – C), subsurface runoff (D – F), and fissures runoff (G – I), respectively. The dot means the average nitrogen concentration and the graph means the standard deviation.

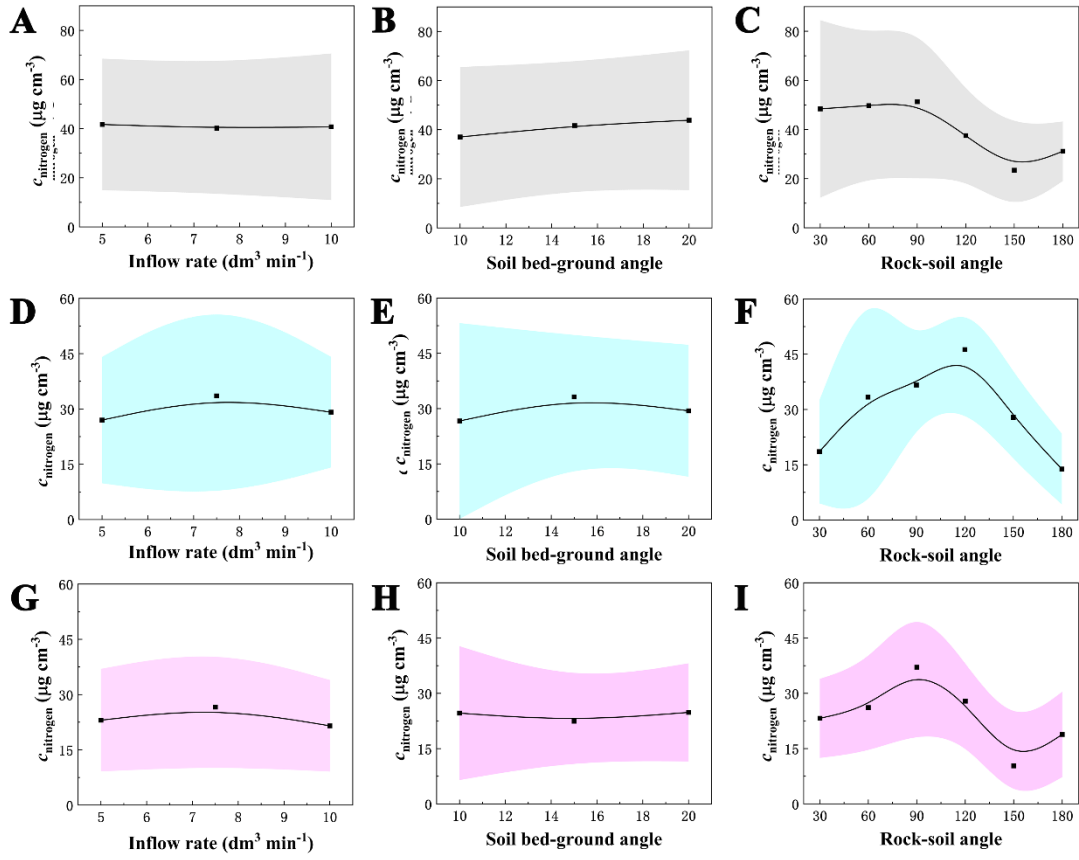

**Figure S3.** Characteristics relationships between the  $\text{NO}_3\text{-N}$  concentration and  $v$ ,  $\alpha$ , and  $\beta$  in soil surface runoff (A – C), subsurface runoff (D – F), and fissures runoff (G – I), respectively. The dot means the average nitrogen concentration and the graph means the standard deviation.

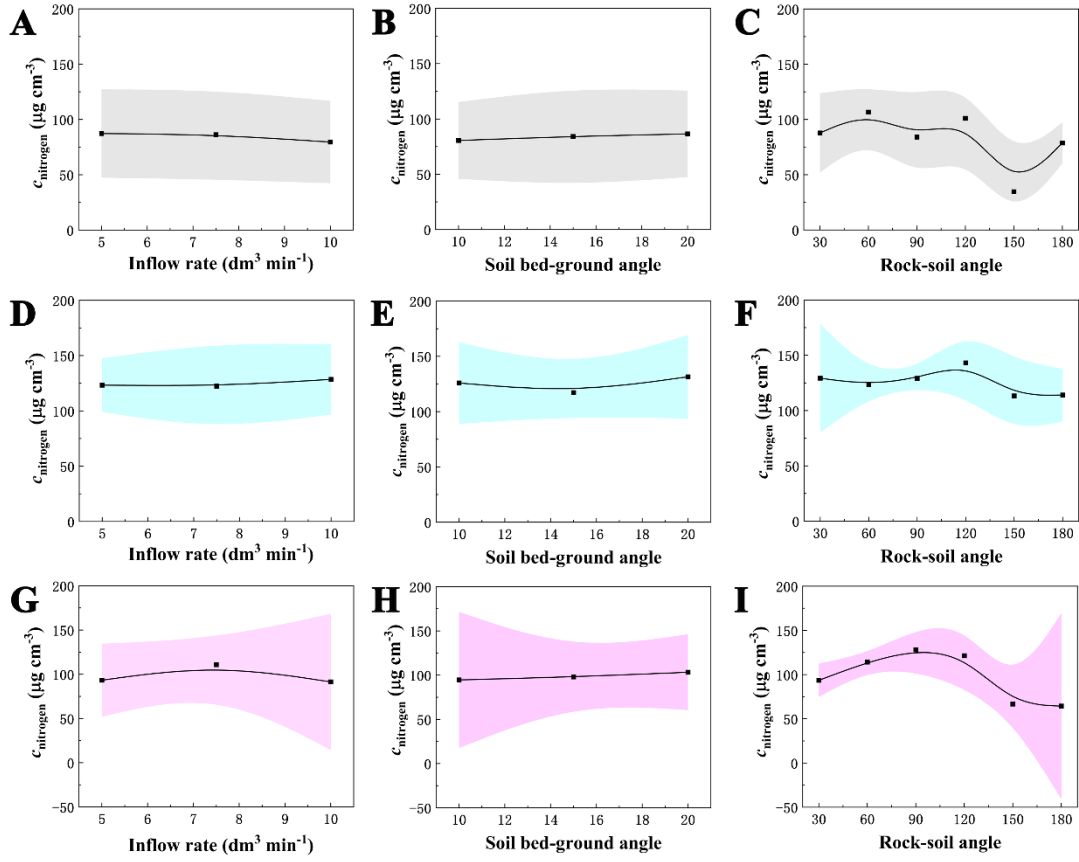

**Figure S4.** Characteristics relationships between the TN concentration and  $v$ ,  $\alpha$ , and  $\beta$  in soil surface runoff (A – C), subsurface runoff (D – F), and fissures runoff (G – I), respectively. The dot means the average nitrogen concentration and the graph means the standard deviation.

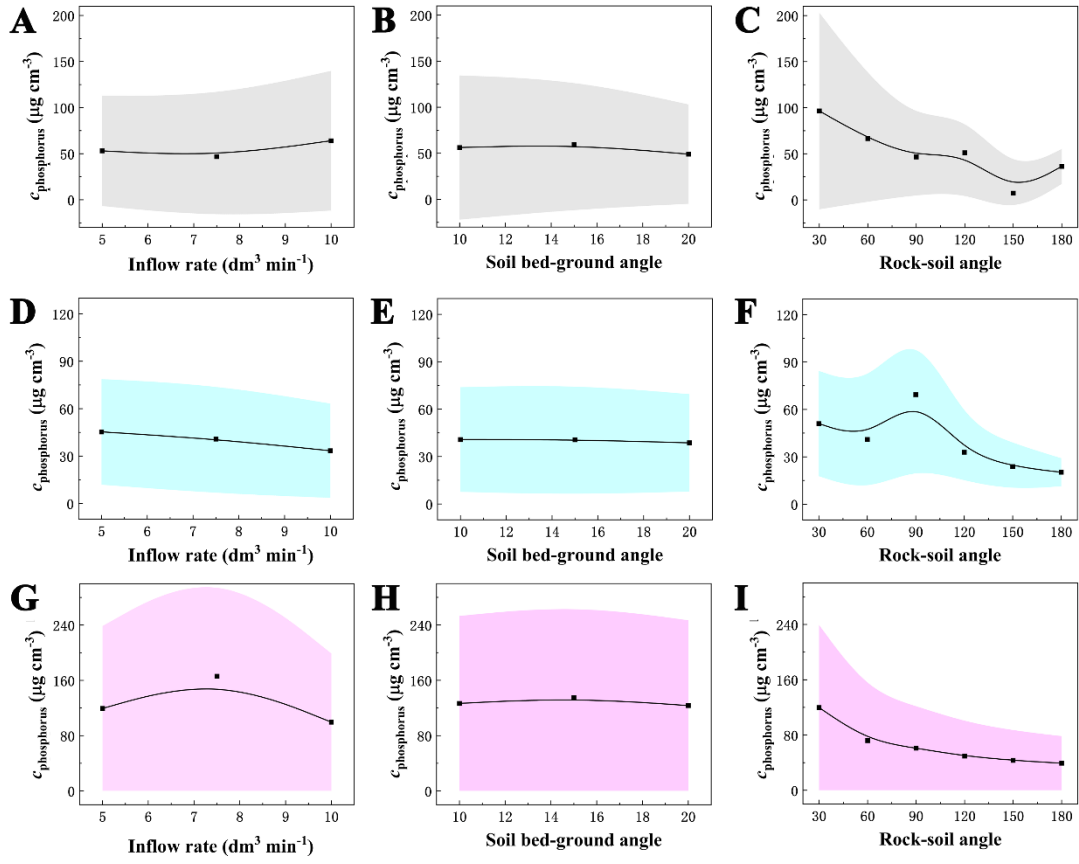

**Figure S5.** Characteristics relationships between the TP concentration and  $v$ ,  $\alpha$ , and  $\beta$  in soil surface runoff (A – C), subsurface runoff (D – F), and fissures runoff (G – I), respectively. The dot means the average nitrogen concentration and the graph means the standard deviation.

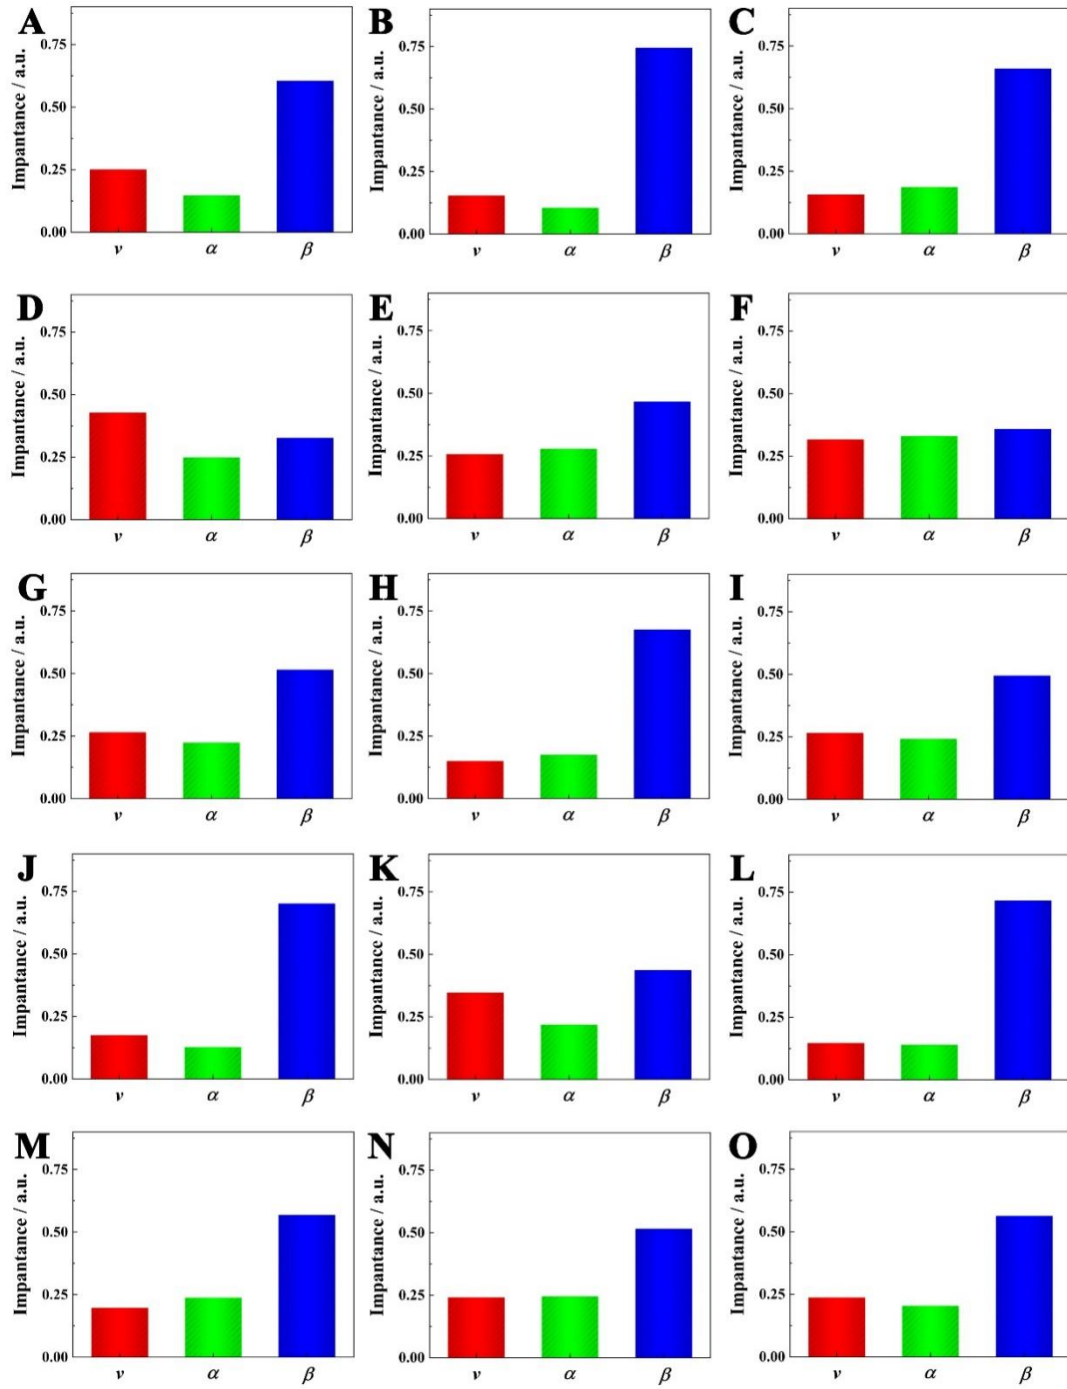

**Figure S6.** Characterizations of the Importance factor to estimate the effect of every feature, including the  $\nu$ ,  $\alpha$ , and  $\beta$ , on the TN (A – C), NH<sub>4</sub>-N (D – F), NO<sub>3</sub>-N (G – I), SP (J – L) and TP (M – O) concentration in the soil surface runoff (A, D, G, J and M), subsurface runoff (B, E, H, K and N), and fissures runoff (C, F, I, L and O), respectively.



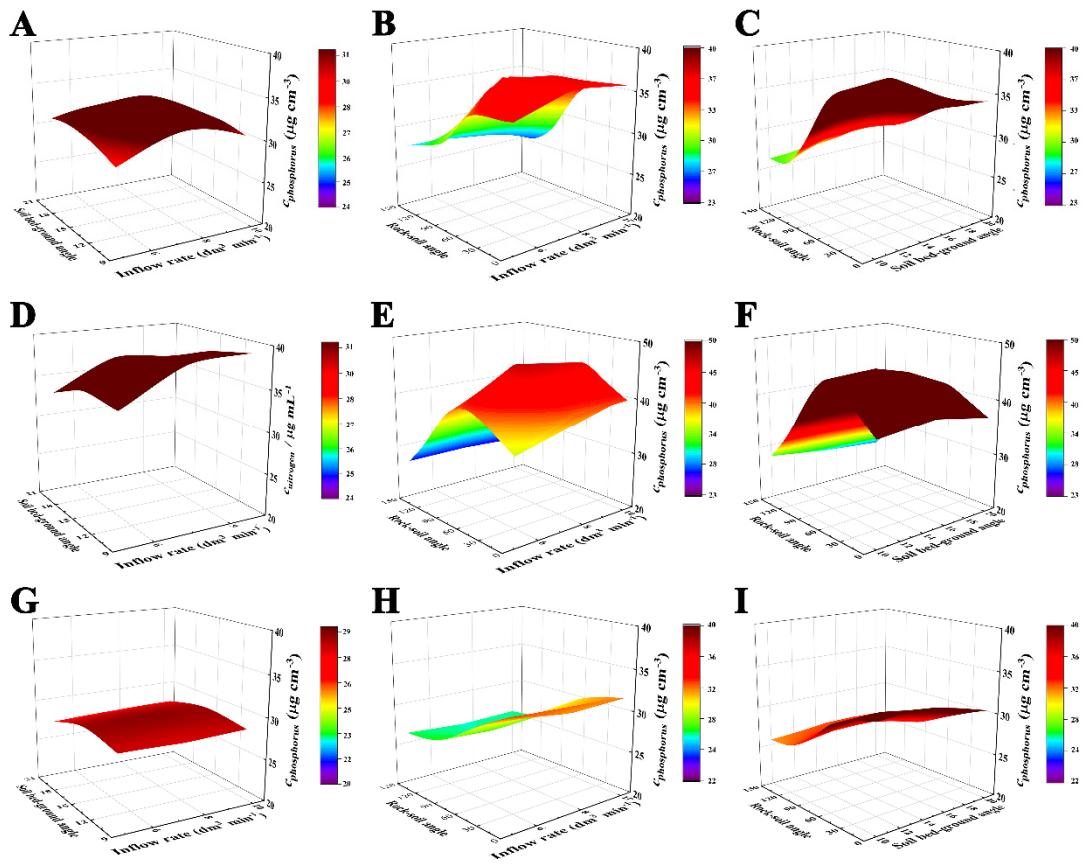

**Figure S7.** Characterizations of the relationship between the concentration of SP in the soil surface runoff (A – C), subsurface runoff (D – F), and fissures runoff (G – I) and the  $v$ ,  $\alpha$ , and  $\beta$ , respectively.

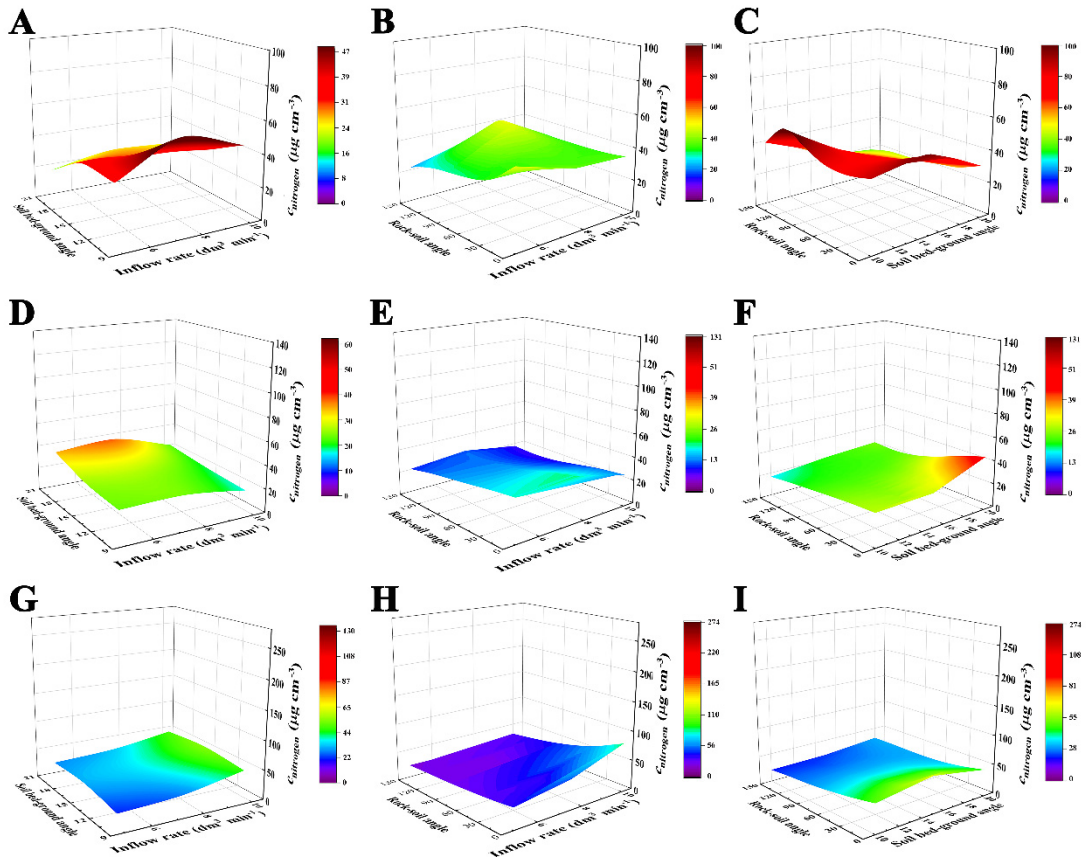

**Figure S8.** Characterizations of the relationship between the concentration of  $\text{NH}_4\text{-N}$  in the soil surface runoff (A – C), subsurface runoff (D – F), and fissures runoff (G – I) and the  $\nu$ ,  $\alpha$ , and  $\beta$ , respectively.

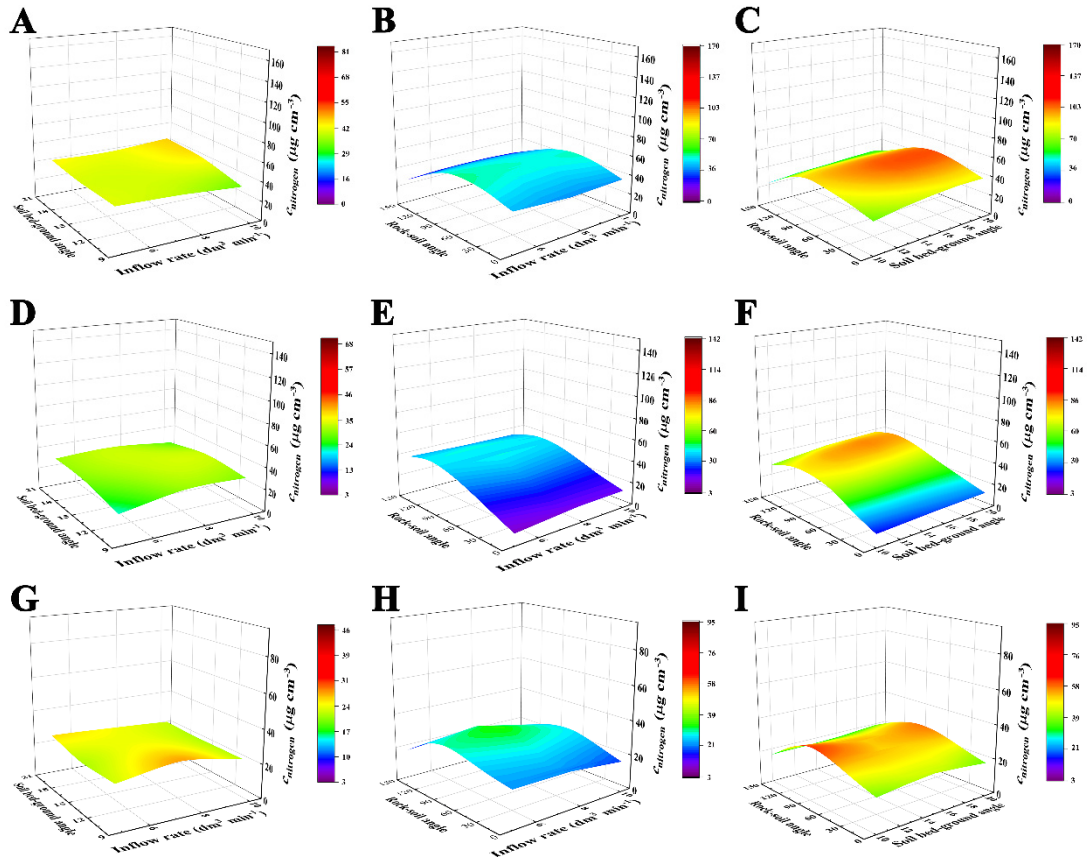

**Figure S9.** Characterizations of the relationship between the concentration of  $\text{NO}_3\text{-N}$  in the soil surface runoff (A – C), subsurface runoff (D – F), and fissures runoff (G – I) and the  $\nu$ ,  $\alpha$ , and  $\beta$ , respectively.

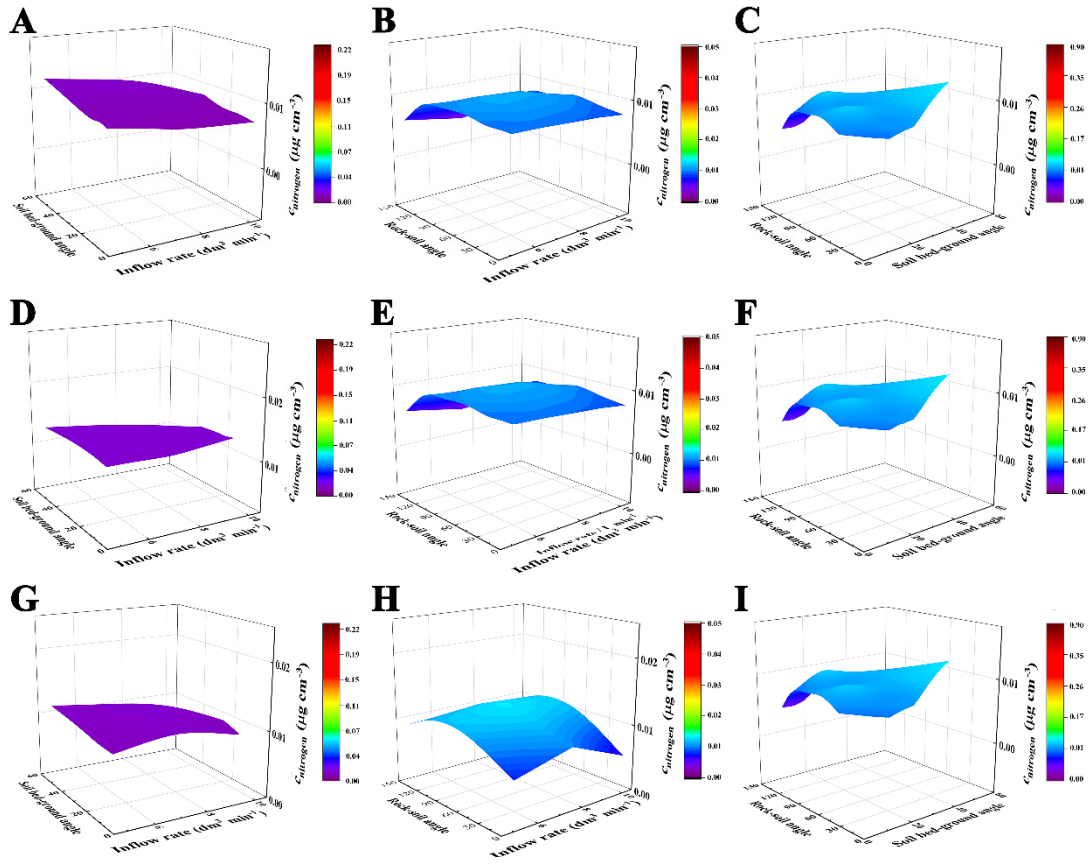

**Figure S10.** Characterizations of the relationship between the concentration of TN in the soil surface runoff (A – C), subsurface runoff (D – F), and fissures runoff (G – I) and the  $v$ ,  $\alpha$ , and  $\beta$  respectively.

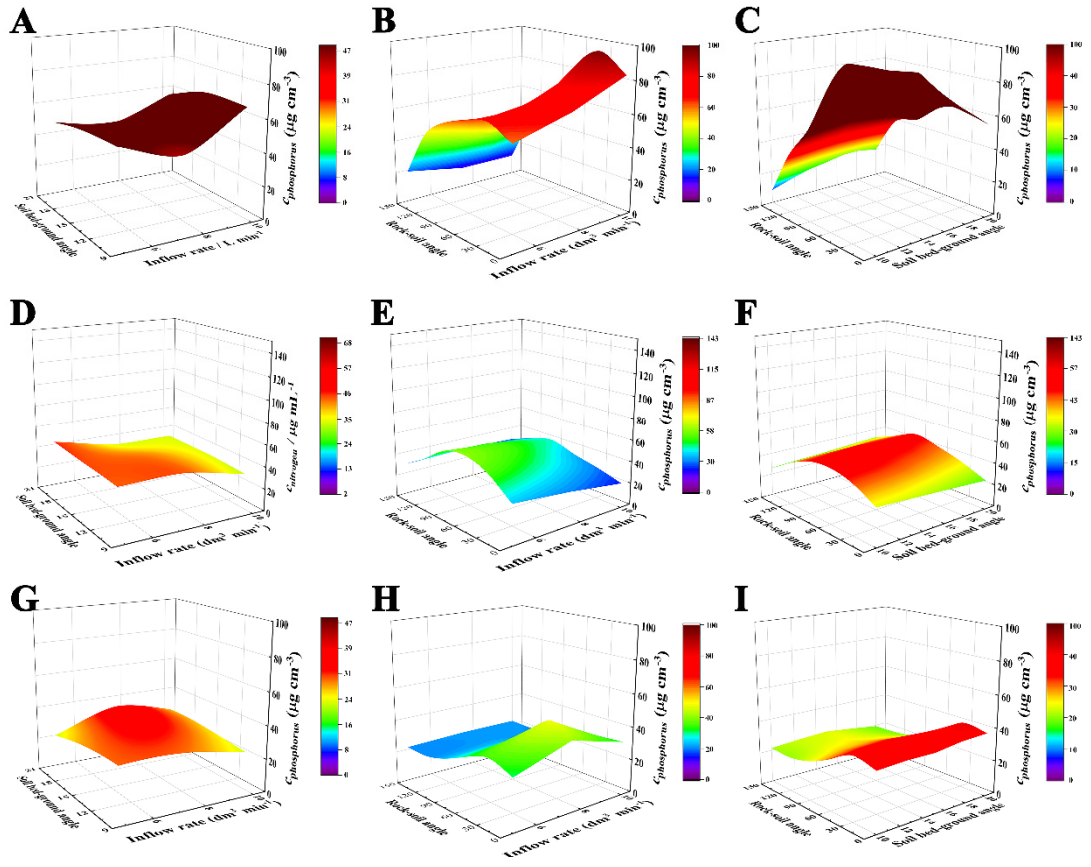

**Figure S11.** Characterizations of the relationship between the TP concentration in the soil surface runoff (A – C), subsurface runoff (D – F), and fissures runoff (G – I) and the  $v$ ,  $\alpha$ , and  $\beta$ , respectively.

## 1. Frame diagram of RF

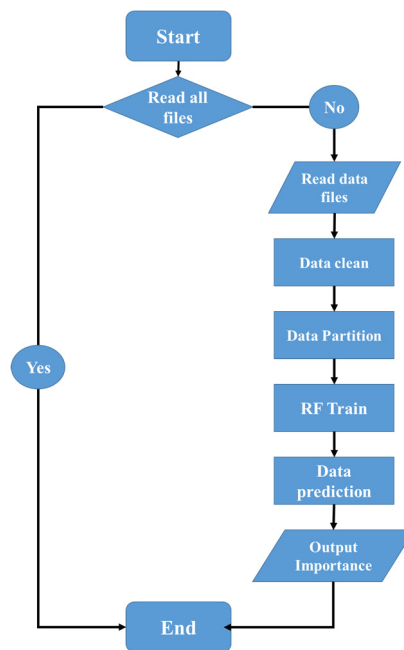

## 2. RF code

```
import pandas as pd
from sklearn.metrics import r2_score, mean_squared_error, mean_absolute_error
from matplotlib import pyplot as plt
from sklearn.ensemble import RandomForestRegressor
from sklearn.model_selection import train_test_split
import numpy as np
plt.rcParams['font.sans-serif']=['SimHei']
plt.rcParams['axes.unicode_minus']=False
```

```
from glob import glob
print(glob("*xlsx"))
```

```
def f(x):
    try:
        return float(x)
    except:
        return np.nan
```

```
for file_name in glob("*xlsx"):
    data = pd.read_excel(file_name,header=1)
    label_name = "Concentration"
    try:
        data = data[["Flow","Angle","RockAngle",label_name]]
    except:
        print("Wrong Name! ")
```

```

data["Flow"] = data["Flow"].apply(f )
data = data.dropna()

data_x = data[["Flow","Angle","RockAngle"]]
data_y = data[label_name]
X_train, X_test, y_train, y_test = train_test_split(data_x, data_y, test_size=0.25,
random_state=0)

print("Name::",file_name)
print("Target: ",label_name)
print("Sum of datasets: ",data_x.shape[0])
print("Training set: ",X_train.shape[0])
print("Test set: ",X_test.shape[0])

rf = RandomForestRegressor()
rf.fit(X_train, y_train)
predictions = rf.predict(X_test)
print("Goodness of fit",r2_score(predictions,y_test))
print("MSE",mean_squared_error(predictions,y_test))
print("MAE",mean_absolute_error(predictions,y_test))
print("Importance: ")
print(list(zip(X_train.columns,rf.feature_importances_)))
plt.barh(X_train.columns, rf.feature_importances_)
plt.show()

```
